# Supplementary material
Source: Research Square preprint supplement (doi:10.21203/rs.3.rs-8820590/v1)
Supplement: Supplementary file 1 [file 9b1ffeca3d0c0c55293a037f.docx]

**SUPPLEMENTARY MATERIALS**

**Table S1** Strains and plasmids used in this study.

**Table S2** Primers used for SSM.

**Table S3** Primers used for SM.

**Table S4** Primers used for plasmid construction in *G. oxydans*.

**Fig. S1.** The flowchart of the experimental scheme.

**Fig. S2.** Construction of expression vectors of pBBR-*gHp0169* (a), pBBR-*gHp0169*-*xdh*M3 (b), pBBR-*gHp0169-xdh*M3-*gHp0169-gdh* (c), and pBBR-*gHp0169-xdh*M3-*gHp0169-gdh-gHp0169-vhb* (f).

**Fig. S3.** The crystal structures of the tetramer and monomer of *Go*XDH.

**Fig. S4.** SDS-PAGE analysis of *Go*XDHand *Go*XDHM3 expressed in *E. coli* BL21(DE3); 1, supernatant of *Go*XDH; 2, purified *Go*XDH; 3, supernatant of *Go*XDHM3; 2, purified *Go*XDHM3.

**Fig. S5.** Effects of temperature and pH on the reducing activity of *Go*XDHand *Go*XDHM3.

**Fig. S6.** Time-course of substrate consumption and biomass during the cell cultivation of *G. oxydans*/XDHM3-GDH-VHb at different string speeds in a 10-L stirred bioreactor (a) 400 rpm; (b) 500 rpm; (c) 600 rpm; (d) 700 rpm.

**Table S1** Strains and plasmids used in this study.

| Strains or plasmids | Characteristics | Reference |
| --- | --- | --- |
| **Strains** |  |  |
| *G. oxydans* 621H | Xylitol production strain | Prust et al., 2005 |
| *E. coli* DH5α | *F−*, *endA1*, *hsdR17* (*rk-mk-*), *supE44*, *thi*1, *recA*1, *gyrA*, (Nalr), *relA*1, D (*lacZYAargF*), U169, and F80*lac*ZDM15 | Invitrogen |
| *E. coli* HB101 | *F−*, *hsdS*20 (r-B, m-B), *supE*44, *ara-*14, *galK-*2, *lacY*1, *proA*2, *rpsL*20, *xyl*-5, *mtl*-1, *recA*13, *KanR*, *oriColE*1, *RK*2-*Mob*+, *RK*2*-Tra*+, and *mH*-1 with plasmid pRK2013 | Invitrogen |
| **Plasmids** |  |  |
| pET-28b-*xdh* | Kanar, expression cassette containing the gene of *xdh* from *G. oxydans* | This study |
| pET-28b-*gdh* | Kanar, expression cassette containing the gene of *gdh* with RBSfrom *Exiguobacterium sibiricum* | [1] |
| pET-28b-*vhb* | Kanar, expression cassette containing the gene of *vhb* with RBS from *Vitreoscilla* | [2] |
| pBBR1MCS-5 | Gmr, broad-host-range cloning vector | [3] |
| pBBR-*gHp0169* | Gmr, expression cassette containing the *gHp0169* promoter and *gHp0169* terminator | [4] |
| pBBR-*gHp0169*-*xdh* | Gmr, expression cassette containing the *gHp0169* promoter, *xdh*, and *gHp0169* terminator | This study |
| pBBR-*gHp0169*-*xdh- gHp0169*-*gdh* | Gmr, expression cassette containing the genes of *xdh* and *gdh* have their own *gHp0169* promoter, RBS and *gHp0169* erminator | This study |

**Table S1** Strains and plasmids used in this study (Continued).

| Strains or plasmids | Characteristics | Reference |
| --- | --- | --- |
| pBBR- *gHp0169*-*xdh- gHp0169*-*gdh-gHp0169*-*vhb* | Gmr, expression cassette containing the genes of *xdh, gdh, and vhb* have its own *gHp0169* promoter, RBS, and *gHp0169* terminator | This study |

**Table S2** Primers used for SSM.

| Primer | Sequence (5’-3’) |
| --- | --- |
| S77-F | GCACCGTTGATNNKGTTGTTCGTG |
| S77-R | CACGAACAACMNNATCAACGGTGC |
| F87-F | CGGTAAAATCGATNNKCTGTTCAAC |
| F87-R | GTTGAACAGMNNATCGATTTTACCG |
| D103-F | CTCCGGTTCAGNNKTACCCGAGC |
| D103-R | GCTCGGGTAMNNCTGAACCGGAG |
| S106-F | GGATTACCCGNNKGATGATTTCGC |
| S106-R | GCGAAATCATCMNNCGGGTAATCC |
| A110-F | GCGATGATTTCNNKCGTGTTCTG |
| A110-R | CAGAACACGMNNGAAATCATCGC |
| V117-F | GACCATCAACNNKACCGGCGCGTTCC |
| V117-R | GGAACGCGCCGGTMNNGTTGATGGTC |
| T118-F | GACCATCAACGTGNNKGGCGCGTTCC |
| T118-R | GGAACGCGCCMNNCACGTTGATGGTC |
| K149-F | CATGGCGGGTGTTNNKGGCCCGCCGAAC |
| K149-R | GTTCGGCGGGCCMNNAACACCCGCCATG |
| P152-F | GGCCCGCNNKACATGGCGGCATAC |
| P152-R | GTATGCCGCCATGTMNNGCGGGCC |
| A156-F | CGAACATGGCGNNKTACGGTGCG |
| A156-R | CGCACCGTAMNNCGCCATGTTCG |
| G158-F | CATGGCGGCATACNNKGCGAGCAAAGGC |
| G158-R | GCCTTTGCTCGCMNNGTATGCCGCCATG |
| G162-F | GTGCGAGCAAANNKGCGATCATCG |
| G162-R | CGATGATCGCMNNTTTGCTCGCAC |
| D107-F | GGATTACCCGAGCNNKGATTTCGCGCG |
| D107-R | CGCGCGAAATCMNNGCTCGGGTAATCC |

**Table S2** Primers used for SSM (Continued).

| Primer | Sequence (5’-3’) |
| --- | --- |
| R111-F | CGATGATTTCGCGNNKGTTCTGACCATC |
| R111-R | GATGGTCAGAACMNNCGCGAAATCATCG |
| L113-F | GATTTCGCGCGTGTTNNKACCATCAACGTGAC |
| L113-R | GTCACGTTGATGGTMNNAACACGCGCGAAATC |
| T114-F | CGCGCGTGTTCTGNNKATCAACGTGACC |
| T114-R | GGTCACGTTGATMNNCAGAACACGCGCG |
| I115-F | GTGTTCTGACCNNKAACGTGAC |
| I115-R | GTCACGTTMNNGGTCAGAACAC |
| T118-F | CTGACCATCAACGTGNNKGGCGCGTTCCAC |
| T118-R | GTGGAACGCGCCMNNCACGTTGATGGTCAG |
| H122-F | GACCGGCGCGTTCNNKGTTCTGAAAGCG |
| H122-R | CGCTTTCAGAACMNNGAACGCGCCGGTC |
| S128-F | CGTTCTGAAAGCGGTTNNKCGTCAGATGATCACC |
| S128-R | GGTGATCATCTGACGMNNAACCGCTTTCAGAACG |
| R129-F | CTGAAAGCGGTTAGCNNKCAGATGATCACCC |
| R129-R | GGGTGATCATCTGMNNGCTAACCGCTTTCAG |
| G130-F | GCGGTTAGCCGTNNKATGATCACCCAGAAC |
| G130-R | GTTCTGGGTGATCATMNNACGGCTAACCGC |
| T133-F | CCGTCAGATGATCNNKCAGAACTACGGCCG |
| T133-R | CGGCCGTAGTTCTGMNNGATCATCTGACGG |
| Q134-F | GTCAGATGATCACCNNKAACTACGGCCGT |
| Q134-R | ACGGCCGTAGTTMNNGGTGATCATCTGAC |

**Table S3** Primers used for SM.

| Primer | Sequence (5’-3’) |
| --- | --- |
| S77-F | GCACCGTTGATTGTGTTGTTCGTG |
| S77-R | CACGAACAACACAATCAACGGTGC |
| S106-F | GGATTACCCGAACGATGATTTCGC |
| S106-R | GCGAAATCATCGTTCGGGTAATCC |
| A110-F | GCGATGATTTCAACCGTGTTCTG |
| A110-R | CAGAACACGGTTGAAATCATCGC |
| T114-F | CGCGCGTGTTCTGCATATCAACGTGACC |
| T114-R | GGTCACGTTGATATGCAGAACACGCGCG |
| I115-F | GTGTTCTGACCAGGAACGTGAC |
| I115-R | GTCACGTTCCTGGTCAGAACAC |

**Table S4** Primers used for plasmid construction in *G. oxydans*.

| Primer | Sequence (5’-3’) |
| --- | --- |
| pBBR-*gHp*-F | GATGAAGCCCTTTCCGCAAGG |
| pBBR-*gHp*-R | GCGGAAGGCGTTATACCCTG |
| *xdh*-F | CAGGGTATAACGCCTTCCGCcagagtttgaggcattcggaat |
| *xdh*-R | GTCCTTGCGGAAAGGGCTTCAtcaaccgccagcaatcggcag |
| *zwf*-F | TTCAGGGTATAACGCCTTCCGCcgagaggtcagagagtcttccat |
| *zwf*-R | GTCCTTGCGGAAAGGGCTTCAttactccgacgcttcatgccag |
| *pnt123*-F | CAGGGTATAACGCCTTCCGCcagacacaggatcgcagccaatg |
| *pnt123*-R | GTCCTTGCGGAAAGGGCTTCAttacgaggcggagaggccct |
| *gnd*-F | cagacacaggatcgcagccaATGTACAACAGCCTGAAAGG |
| *gnd*-R | CCTTGCGGAAAGGGCTTCATTTATTAACCACGGCCCGCCTGG |
| *vhb*-F | CAGGGTATAACGCCTTCCGCGAACTTAAGGAAGACCCTC |
| *vhb*-R | CCTTGCGGAAAGGGCTTCATCTTATTCGACGGCCTGGGCG |
| pBBR-*xdh*-F | GAGCTCCAATTCGCCCTATAGTG |
| pBBR-*xdh*-R | GCTGCAGGAATTCGATATCAAGC |
| *gHp-gdh*-F | GCTTGATATCGAATTCCTGCAGCGAAAGCGGCTGGCGCGTG |
| *gHp-gdh*-R | CACTATAGGGCGAATTGGAGCTCGAGGCGGCGATACTACCGGC |
| pBBR-*xdh*-*gdh*-F | GTCGTATTACGCGCGCTCAC |
| pBBR-*xdh*-*gdh*-R | CACTATAGGGCGAATTGGAGCTC |
| *gHp*-v*hb*-F | GTCGTATTACGCGCGCTCAC |
| *gHp*-*vhb*-R | CACTATAGGGCGAATTGGAGCTC |


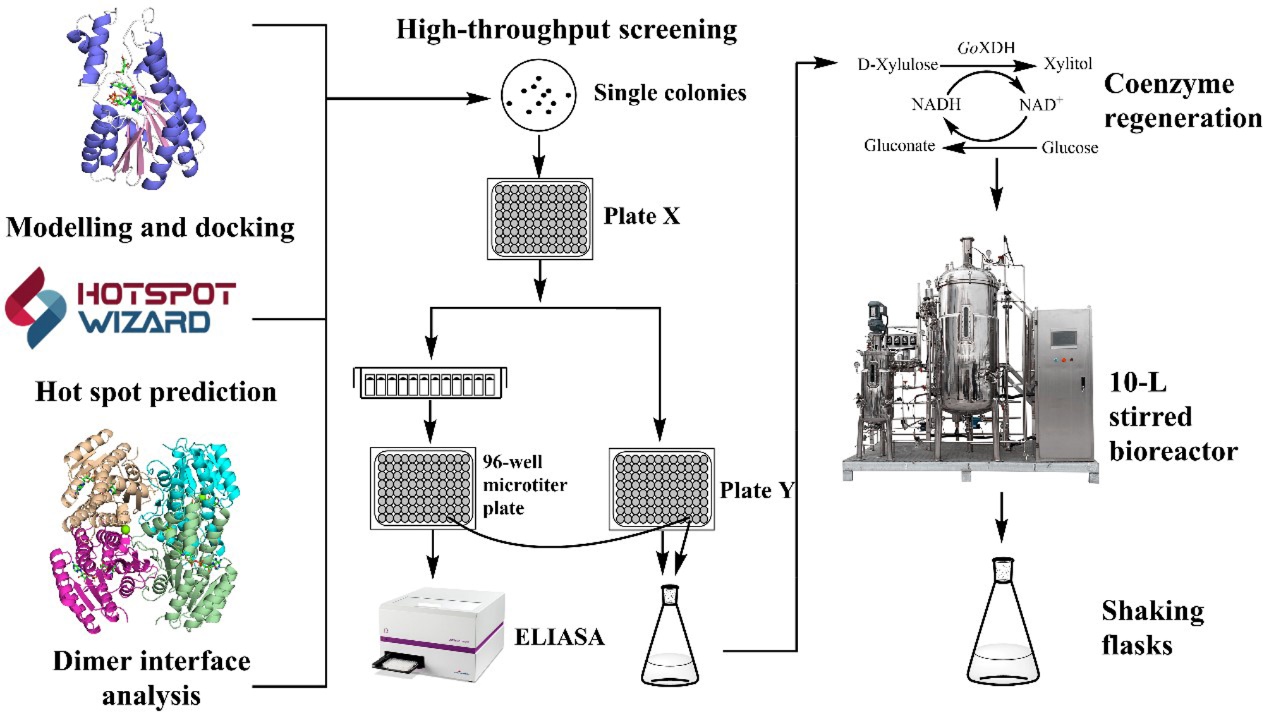


**Fig. S1.** The flowchart of the experimental scheme.


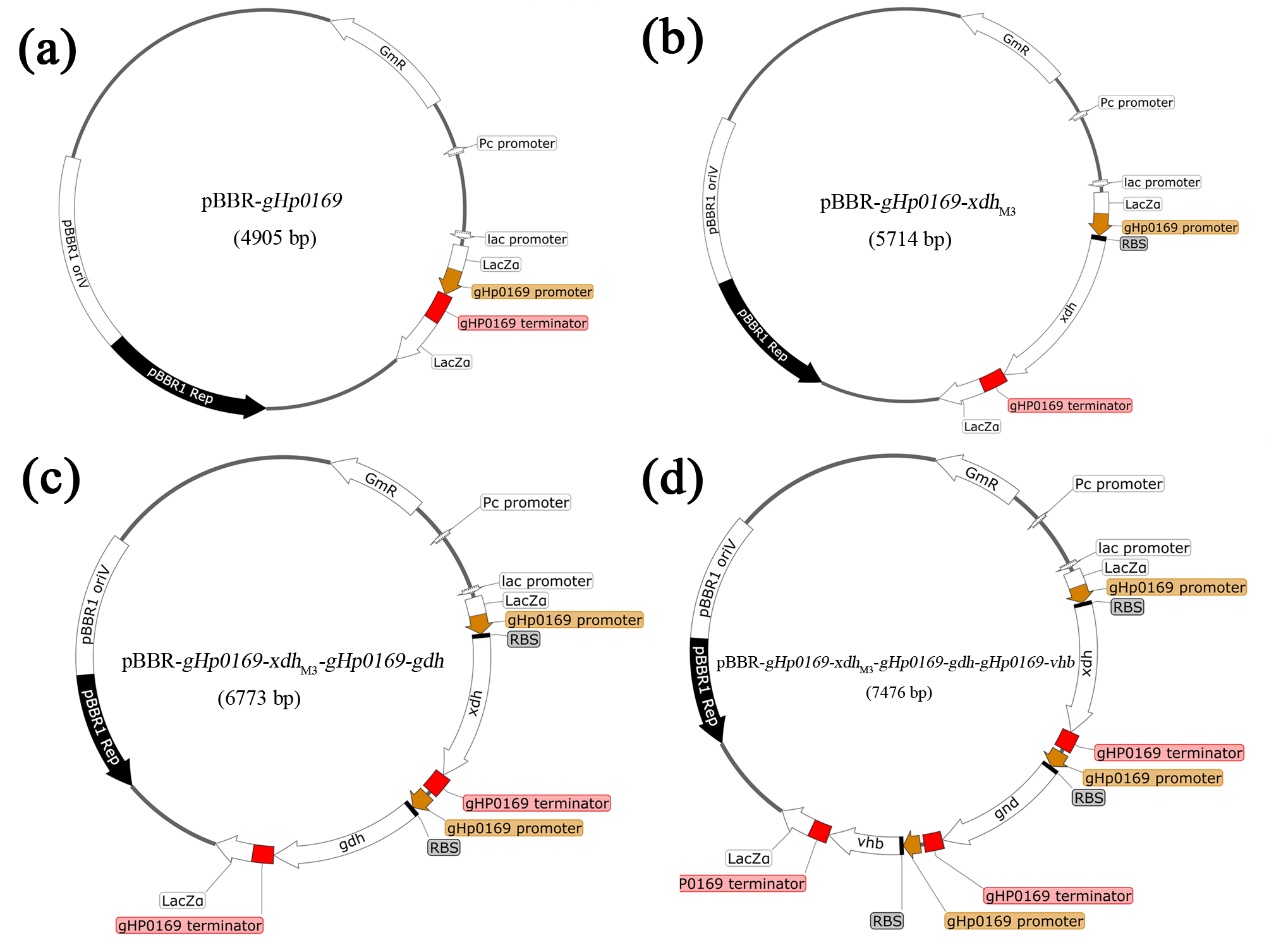


**Fig. S2.** Construction of expression vectors of pBBR-*gHp0169* (a), pBBR-*gHp0169*-*xdh*M3 (b), pBBR-*gHp0169-xdh*M3-*gHp0169-gdh* (c), and pBBR-*gHp0169-xdh*M3-*gHp0169-gdh-gHp0169-vhb* (d).


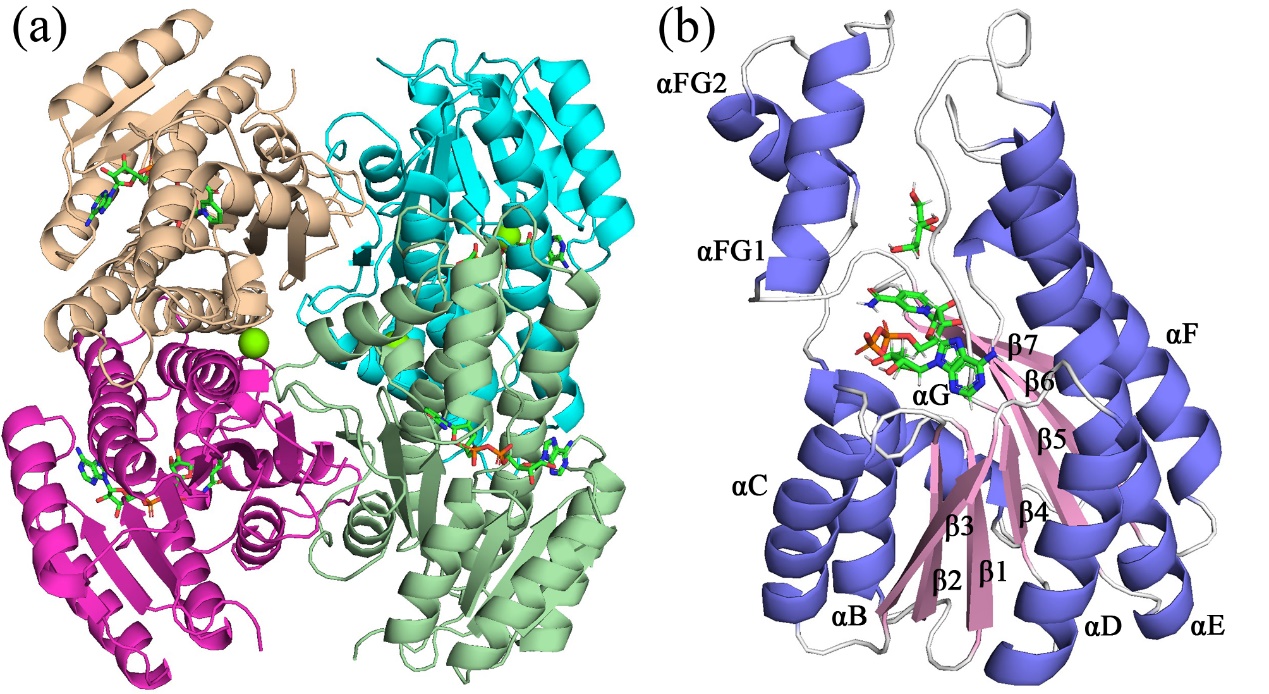


**Fig. S3.** The crystal structures of the tetramer and monomer of *Go*XDH.


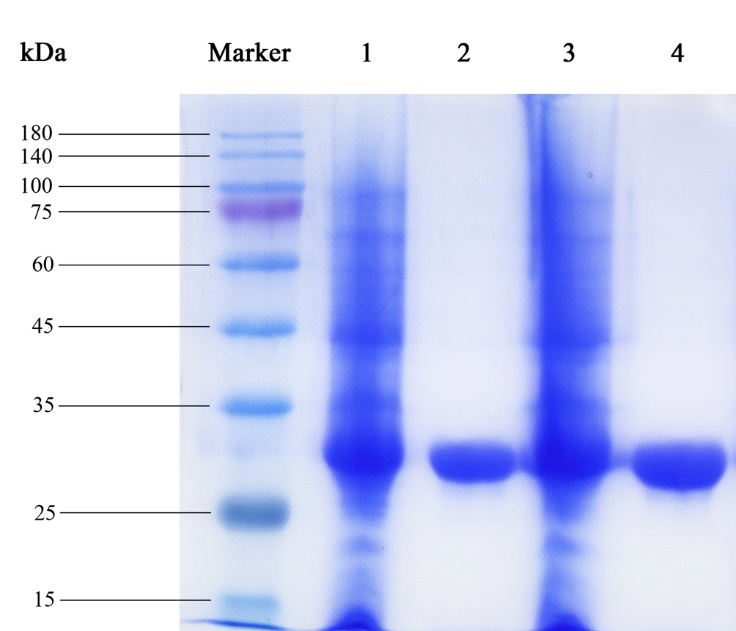


**Fig. S4.** SDS-PAGE analysis of *Go*XDHand *Go*XDHM3 expressed in *E. coli* BL21(DE3); 1, supernatant of *Go*XDH; 2, purified *Go*XDH; 3, supernatant of *Go*XDHM3; 2, purified *Go*XDHM3.


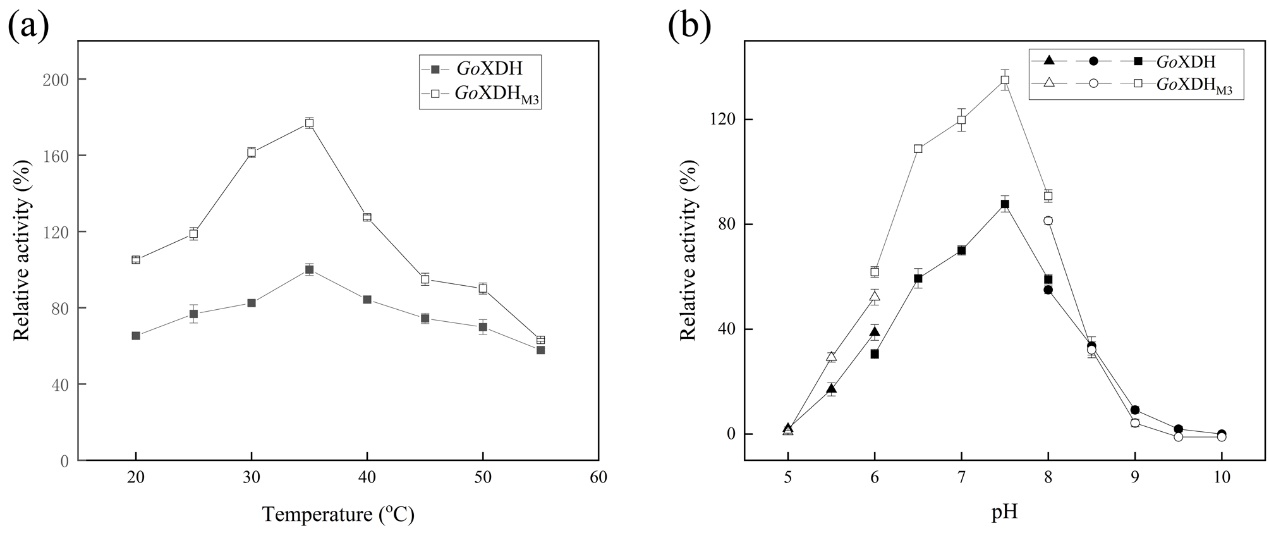


**Fig. S5.** Effects of temperature and pH on the reducing activity of *Go*XDHand *Go*XDHM3.


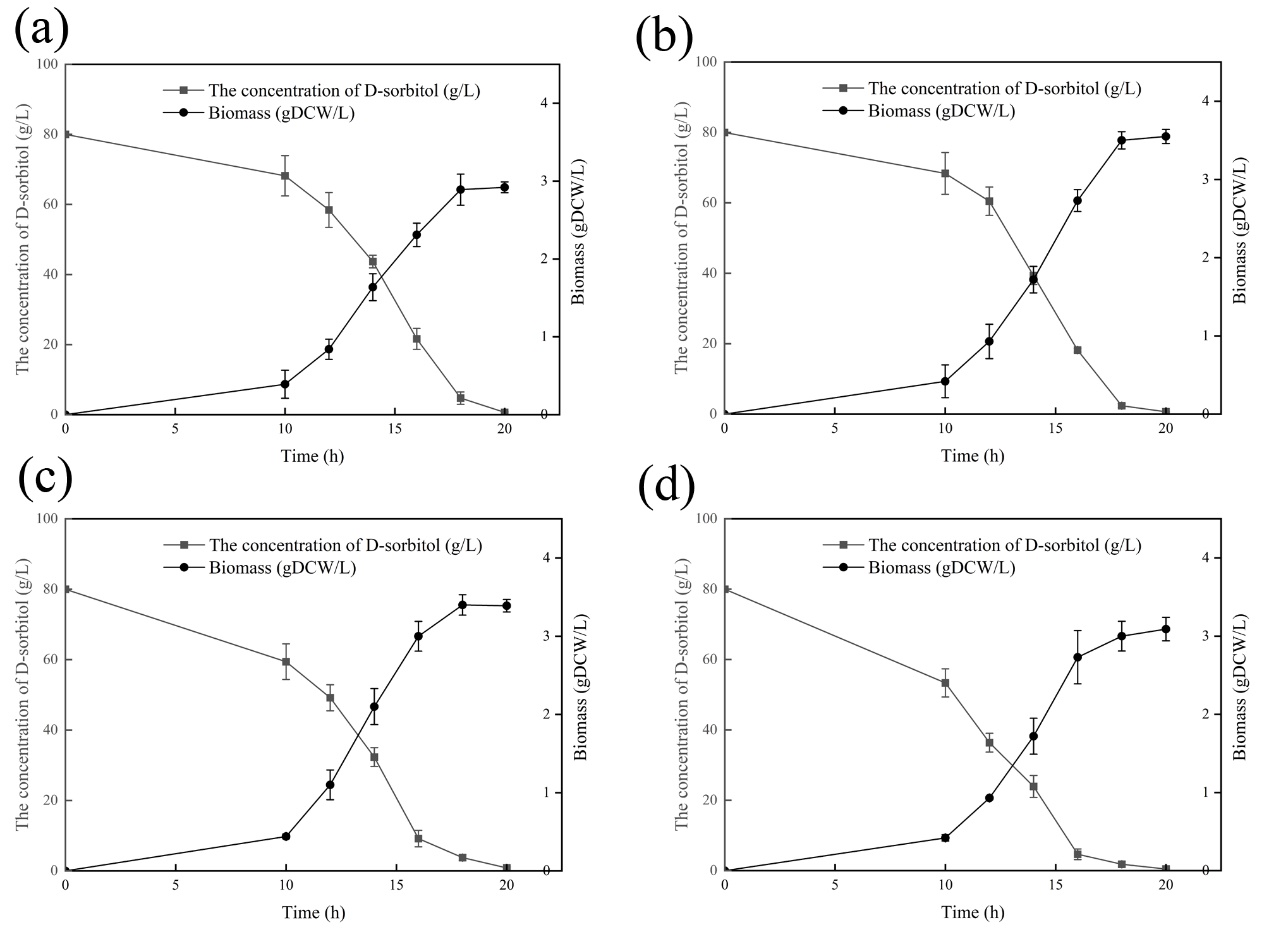


**Fig. S6.** Time-course of substrate consumption and biomass during the cell cultivation of *G. oxydans*/XDHM3-GDH-VHb at different string speeds in a 10-L stirred bioreactor (a) 400 rpm; (b) 500 rpm; (c) 600 rpm; (d) 700 rpm.

**References**

1. Qiu S, Xu SY, Li SF, Meng KM, Cheng F, Wang YJ, Zheng YG: **Fluorescence‐based screening for engineered aldo‐keto reductase KmAKR with improved catalytic performance and extended substrate scope**. *Biotechnology Journal* 2021, **16**(9):2100130.

2. Ouyang P, Wang H, Hajnal I, Wu Q, Guo Y, Chen GQ: **Increasing oxygen availability for improving poly (3-hydroxybutyrate) production by *Halomonas***. *Metabolic engineering* 2018, **45**:20-31.

3. Liu D, Ke X, Hu Z-C, Zheng Y-G: **Combinational expression of D-sorbitol dehydrogenase and pyrroloquinoline quinone increases 6-(*N*-hydroxyethyl)-amino-6-deoxy-α-L-sorbofuranose production by Gluconobacter oxydans through cofactor manipulation**. *Enzyme and Microbial Technology* 2020, **141**:109670.

4. Jia DX, Liu D, Zheng YG: **Heterologous expression，purification and enzymatic characterization of succinate-semialdehyde dehydrogenase GabD4**. *Food and Fermentation Industries* 2016, **42**(5):97-101.
